# Supplementary material for: Short-Lived Antibody-Mediated Saliva Immunity against SARS-CoV-2 after Vaccination
Source: PubMed Central journal article supplement (PMC10101069; doi:10.1128/spectrum.04947-22), 2023-03-06
Supplement: reviewer-comments.pdf [file reviewer-comments.pdf]

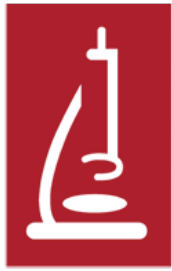

AMERICAN  
SOCIETY FOR  
MICROBIOLOGY

# Microbiology Spectrum

## Short-lived antibody-mediated saliva immunity against SARS-CoV-2 after vaccination

Johannes Madsen, Bettina Holm, Laura Pérez-Alós, Rafael Bayarri-Olmos, Anne Rosbjerg, Kamille Fogh, Mia Pries-Heje, Dina Møller, Cecilie Hansen, Line Heftdal, Rasmus Hasselbalch, Sebastian Hamm, Ruth Frikke-Schmidt, Linda Hilsted, Susanne Nielsen, Kasper Iversen, Henning Bundgaard, and Peter Garred

*Corresponding Author(s): Peter Garred, Rigshospitalet*

---

### Review Timeline:

|                     |                  |
|---------------------|------------------|
| Submission Date:    | December 1, 2022 |
| Editorial Decision: | January 30, 2023 |
| Revision Received:  | February 3, 2023 |
| Accepted:           | February 9, 2023 |

---

*Editor: Takamasa Ueno*

*Reviewer(s): The reviewers have opted to remain anonymous.*

### Transaction Report:

(Note: With the exception of the correction of typographical or spelling errors that could be a source of ambiguity, letters and reports are not edited. The original formatting of letters and referee reports may not be reflected in this compilation.)

DOI: <https://doi.org/10.1128/spectrum.04947-22>

January 30, 2023

Prof. Peter Garred  
University of Copenhagen  
Department of Clinical Immunology  
Copenhagen  
Denmark

Re: Spectrum04947-22 (Short-lived antibody-mediated saliva immunity against SARS-CoV-2 after vaccination)

Dear Prof. Peter Garred:

Our reviewers suggested modifications of the current form of your manuscript based on the points shown below. In particular, both ones strongly suggested to improve writing and correct grammatical errors throughout the manuscript when you resubmit the revised version.

Thank you for submitting your manuscript to Microbiology Spectrum. When submitting the revised version of your paper, please provide (1) point-by-point responses to the issues raised by the reviewers as file type "Response to Reviewers," not in your cover letter, and (2) a PDF file that indicates the changes from the original submission (by highlighting or underlining the changes) as file type "Marked Up Manuscript - For Review Only". Please use this link to submit your revised manuscript - we strongly recommend that you submit your paper within the next 60 days or reach out to me. Detailed instructions on submitting your revised paper are below.

Link Not Available

Below you will find instructions from the Microbiology Spectrum editorial office and comments generated during the review.

ASM policy requires that data be available to the public upon online posting of the article, so please verify all links to sequence records, if present, and make sure that each number retrieves the full record of the data. If a new accession number is not linked or a link is broken, provide production staff with the correct URL for the record. If the accession numbers for new data are not publicly accessible before the expected online posting of the article, publication of your article may be delayed; please contact the ASM production staff immediately with the expected release date.

The ASM Journals program strives for constant improvement in our submission and publication process. Please tell us how we can improve your experience by taking this quick [Author Survey](#).

Sincerely,

Takamasa Ueno

Editor, Microbiology Spectrum

Journals Department  
American Society for Microbiology  
1752 N St., NW  
Washington, DC 20036  
E-mail: [spectrum@asmusa.org](mailto:spectrum@asmusa.org)

Reviewer comments:

Reviewer #1 (Comments for the Author):

This study examines the antibody response in saliva and serum 2 and 6 months after the first BNT162b2 vaccine. The study found that vaccinated infected individuals had higher antibody levels in saliva at 2 months, but levels declined for both groups after 6 months. The study also found that IgA and IgM antibodies were hardly detectable in saliva at any time points. The study concluded that the salivary antibody response was short-lived and declined to almost undetectable levels after 6 months.

Comments.

1. To avoid confusion, the use of the term "infected individuals/group" to refer to vaccinated individuals with positive antibodies

against the N-protein should be rephrased to avoid any confusion with individuals with natural immunity.

2. The article would benefit from the inclusion of demographic data and characteristics of the individuals in the "vaccinated infected" and "vaccinated uninfected" groups, as this would aid in interpreting the results of the study.
3. The conclusion statement regarding the duration of salivary immunity against SARS-CoV-2 after both natural infection and systemic vaccination should be revised as the data presented in the study does not fully support the extrapolation made.
4. The manuscript contains several grammatical errors, including incorrect use of terms. Additionally, the language and flow of the methodology sections may be improved for better readability.

Reviewer #2 (Comments for the Author):

Johannes Roth Madsen and colleagues presented data which show a short-lived antibody-mediated saliva immunity against SARS-CoV-2 after vaccination.

The manuscript is written in a comprehensive way and I have only minor, but important, comments, especially #5 and #8:

1. page (p) 8: saliva analyses (as these are several)
2. p8: reasons for 89% females in the study should be given. Healthcare personnel is nowadays dominated by females, but not really 9:1.
3. p13: the headlines under "Serum analysis" - which should read "Serum analyses" - end with a ":", which is an unusual format and thus likely not journal style.
4. p13: "people" is an unusual way to describe "participants" or "subjects".
5. p13, last three lines - proof-reading by the co-authors was somewhat sloppy, because it obviously must read "... (Figure 2c and 2e, respectively). After 6 months, almost the same correlation was observed in the infected group ( $\rho=0.53$ ,  $p=0.052$ ), but was lost in the uninfected group ( $\rho=0.14$ ,  $p=0.055$ ) (Figure 2d and 2f, respectively).
6. p14: The study investigates IgG, IgA and IgM in saliva and serum. It is therefore strange, why the IgM data are in a supplementary figure!?
7. p14: The text is partially used to describe figures "Figure 3a depicts...., Figure 3b depicts" which is, unfortunately, generally getting more and more common, but of course wrong: the legends should describe a figure and a statement in the text should be followed by the figure number in parenthesis.  
As an example: "The infected group had a mean serum IgA level against RBD of 2.82 .... compared to 1.74 ... in the uninfected group (p....; **Fig. 3b**).
8. p27 & p29. Again, sloppy proof-reading for both legends: not the antibodies against protein N determine the uninfected subjects (just the contrary) and it is the absence of antibodies against protein N which excludes a previous contact with the virus: "The red line represents SARS-CoV-2 infectious naïve **subjects** based on **the absence of** antibodies against protein N."

Staff Comments:

### Preparing Revision Guidelines

To submit your modified manuscript, log onto the eJP submission site at <https://spectrum.msubmit.net/cgi-bin/main.plex>. Go to Author Tasks and click the appropriate manuscript title to begin the revision process. The information that you entered when you first submitted the paper will be displayed. Please update the information as necessary. Here are a few examples of required updates that authors must address:

- Point-by-point responses to the issues raised by the reviewers in a file named "Response to Reviewers," NOT IN YOUR COVER LETTER.
- Upload a compare copy of the manuscript (without figures) as a "Marked-Up Manuscript" file.
- Each figure must be uploaded as a separate file, and any multipanel figures must be assembled into one file.
- Manuscript: A .DOC version of the revised manuscript
- Figures: Editable, high-resolution, individual figure files are required at revision, TIFF or EPS files are preferred

For complete guidelines on revision requirements, please see the journal Submission and Review Process requirements at <https://journals.asm.org/journal/Spectrum/submission-review-process>. **Submissions of a paper that does not conform to Microbiology Spectrum guidelines will delay acceptance of your manuscript.** "

Please return the manuscript within 60 days; if you cannot complete the modification within this time period, please contact me. If you do not wish to modify the manuscript and prefer to submit it to another journal, please notify me of your decision immediately so that the manuscript may be formally withdrawn from consideration by Microbiology Spectrum.

If your manuscript is accepted for publication, you will be contacted separately about payment when the proofs are issued; please follow the instructions in that e-mail. Arrangements for payment must be made before your article is published. For a

complete list of **Publication Fees**, including supplemental material costs, please visit our [website](#).

Corresponding authors may [join or renew ASM membership](#) to obtain discounts on publication fees. Need to upgrade your membership level? Please contact Customer Service at [Service@asmusa.org](mailto:Service@asmusa.org).

Thank you for submitting your paper to Microbiology Spectrum.

## Response to Reviewers

*We appreciate the effort made by the reviewers to improve this manuscript. Here, we address one by one the questions and comments raised by Reviewer #1 and Reviewer #2.*

### Reviewer comments

#### Reviewer #1 (Comments for the Author):

This study examines the antibody response in saliva and serum 2 and 6 months after the first BNT162b2 vaccine. The study found that vaccinated infected individuals had higher antibody levels in saliva at 2 months, but levels declined for both groups after 6 months. The study also found that IgA and IgM antibodies were hardly detectable in saliva at any time points. The study concluded that the salivary antibody response was short-lived and declined to almost undetectable levels after 6 months.

Comments.

**Reviewer 1 comment #1.** To avoid confusion, the use of the term "infected individuals/group" to refer to vaccinated individuals with positive antibodies against the N-protein should be rephrased to avoid any confusion with individuals with natural immunity.

*Authors reply #1.* Thank you for the comment. We have updated the manuscript accordingly and we are now referring to the "infected individuals" as individuals with hybrid immunity (vaccination + previous infection) and "uninfected individuals" as vaccinated infection-naïve individuals unless vaccination is clearly stated in the sentence.

*In the section regarding saliva assay validation, all samples were collected prior to vaccination, and we are referring to the groups as unvaccinated COVID-19 convalescent individuals and infection-naïve individuals.*

*Moreover, we have updated titles and legends in Figure 2 and Supplementary Figure 1 accordingly to avoid confusions.*

**Reviewer 1 comment #2.** The article would benefit from the inclusion of demographic data and characteristics of the individuals in the "vaccinated infected" and "vaccinated uninfected" groups, as this would aid in interpreting the results of the study.

*Authors reply #2.* We acknowledge the benefit of the inclusion of demographic data and individual characteristics of each vaccinated group (vaccinated, previously infected; and vaccinated, infection-naïve). Therefore, we have modified accordingly Table 1.

**Reviewer 1 comment #3.** The conclusion statement regarding the duration of salivary immunity against SARS-CoV-2 after both natural infection and systemic vaccination should be revised as the data presented in the study does not fully support the extrapolation made.

*Authors reply #3.* We apologize for the ambiguous phrasing in the conclusion statement. We have therefore rephrased it as follows in the discussion:

*“In conclusion, we have shown that IgG is the predominant SARS-CoV-2 specific antibody isotype in saliva 2 months after vaccination, which was elevated in previously infected compared to infection-naïve individuals. Levels of IgG in both groups decreased significantly with around 90% between 2 and 6 months after vaccination, suggesting a rapid decline in antibody-mediated saliva immunity against SARS-CoV-2.”.*

**Reviewer 1 comment #4.** The manuscript contains several grammatical errors, including incorrect use of terms. Additionally, the language and flow of the methodology sections may be improved for better readability.

*Authors reply #4.* We understand the reviewer’s concern regarding the language quality of the manuscript. We have rewritten most part of it to correct the grammar and to improve the reading flow.

**Reviewer #2 (Comments for the Author):**

Johannes Roth Madsen and colleagues presented data which show a short-lived antibody-mediated saliva immunity against SARS-CoV-2 after vaccination.

The manuscript is written in a comprehensive way and I have only minor, but important, comments, especially #5 and #8:

**Reviewer 2 comment #1.** page (p) 8: saliva analyses (as these are several)

*Authors reply #1. Corrected.*

**Reviewer 2 comment #2.** p8: reasons for 89% females in the study should be given. Healthcare personnel is nowadays dominated by females, but not really 9:1.

*Authors reply #2. We are aware of the high percentage of females in our cohort, which we address as a limitation in the discussion section. It is true that the average percentage of females in healthcare personnel is approximately 76-80% in the US and Europe. However, as this study was opened to all healthcare personnel to volunteer to participate, we cannot discard higher participation from personnel from specific job positions, such as nurses or midwives, where the presence of females is even higher. Nevertheless, we are unknown of the specific job position of the participants, but this might be the most likely reason for the higher proportion of females in this study.*

**Reviewer 2 comment #3.** p13: the headlines under "Serum analysis" - which should read "Serum analyses" - end with a ":", which is an unusual format and thus likely not journal style.

*Authors reply #3. Corrected.*

**Reviewer 2 comment #4.** p13: "people" is an unusual way to describe "participants" or "subjects".

*Authors reply #4. Corrected.*

**Reviewer 2 comment #5.** p13, last three lines - proof-reading by the co-authors was somewhat sloppy, because it obviously must read "... (Figure 2c and 2e, respectively). After 6 months, almost the same correlation was observed in the infected group ( $\rho=0.53$ ,  $p=0.052$ ), but was lost in the uninfected group ( $\rho=0.14$ ,  $p=0.055$ ) (Figure 2d and 2f, respectively).)

*Authors reply #5. We apologize for this obvious mistake. We have corrected the labeling accordingly.*

**Reviewer 2 comment #6.** p14: The study investigates IgG, IgA and IgM in saliva and serum. It is therefore strange, why the IgM data are in a supplementary figure!?

*Authors reply #6.* We understand the reviewer's concern regarding the IgM results. We have moved Supplementary Figure 2 from the supplement into the main text (newly name Figure 4).

**Reviewer 2 comment #7.** p14: The text is partially used to describe figures "Figure 3a depicts...., Figure 3b depicts" which is, unfortunately, generally getting more and more common, but of course wrong: the legends should describe a figure and a statement in the text should be followed by the figure number in parenthesis. As an example: "The infected group had a mean serum IgA level against RBD of 2.82 .... compared to 1.74 ... in the uninfected group (p.....; Fig. 3b).

*Authors reply #7.* We appreciate the reviewer's suggestion and we have changed the figure's description accordingly.

**Reviewer 2 comment #8.** p27 & p29. Again, sloppy proof-reading for both legends: not the antibodies against protein N determine the uninfected subjects (just the contrary) and it is the absence of antibodies against protein N which excludes a previous contact with the virus: "The red line represents SARS-CoV-2 infectious naïve subjects based on the absence of antibodies against protein N."

*Authors reply #8.* Corrected.



February 9, 2023

Prof. Peter Garred  
Rigshospitalet  
Department of Clinical Immunology  
Copenhagen  
Denmark

Re: Spectrum04947-22R1 (Short-lived antibody-mediated saliva immunity against SARS-CoV-2 after vaccination)

Dear Prof. Peter Garred:

Your manuscript has been accepted, and I am forwarding it to the ASM Journals Department for publication. You will be notified when your proofs are ready to be viewed.

The ASM Journals program strives for constant improvement in our submission and publication process. Please tell us how we can improve your experience by taking this quick [Author Survey](#).

**Publication Fees:** We have partnered with Copyright Clearance Center to collect author charges. You will soon receive a message from no-reply@copyright.com with further instructions. For questions related to paying charges through RightsLink, please contact Copyright Clearance Center by email at [ASM\\_Support@copyright.com](mailto:ASM_Support@copyright.com) or toll free at +1.877.622.5543. Hours of operation: 24 hours per day, 7 days per week. Copyright Clearance Center makes every attempt to respond to all emails within 24 hours. For a complete list of **Publication Fees**, including supplemental material costs, please visit our [website](#).

ASM policy requires that data be available to the public upon online posting of the article, so please verify all links to sequence records, if present, and make sure that each number retrieves the full record of the data. If a new accession number is not linked or a link is broken, provide production staff with the correct URL for the record. If the accession numbers for new data are not publicly accessible before the expected online posting of the article, publication of your article may be delayed; please contact the ASM production staff immediately with the expected release date.

Corresponding authors may [join or renew ASM membership](#) to obtain discounts on publication fees. Need to upgrade your membership level? Please contact Customer Service at [Service@asmusa.org](mailto:Service@asmusa.org).

Thank you for submitting your paper to Spectrum.

Sincerely,

Takamasa Ueno  
Editor, Microbiology Spectrum

Journals Department  
American Society for Microbiology  
1752 N St., NW  
Washington, DC 20036  
E-mail: [spectrum@asmusa.org](mailto:spectrum@asmusa.org)
