# Supplementary material for: Short-Lived Antibody-Mediated Saliva Immunity against SARS-CoV-2 after Vaccination
Source: PubMed Central journal article supplement (PMC10101069; doi:10.1128/spectrum.04947-22), 2023-03-06
Supplement: spectrum.04947-22-s0001.pdf [file spectrum.04947-22-s0001.pdf]

**Short-lived antibody-mediated saliva immunity against SARS-CoV-2 after vaccination****Supplemental information:****Table of contents:**

**Supplementary Figures:** 2

**Supplementary Figure 1.** Validation tests of antibodies in saliva against RBD from SARS-CoV-2 in the Luminex assay 2

**Supplementary Figures:**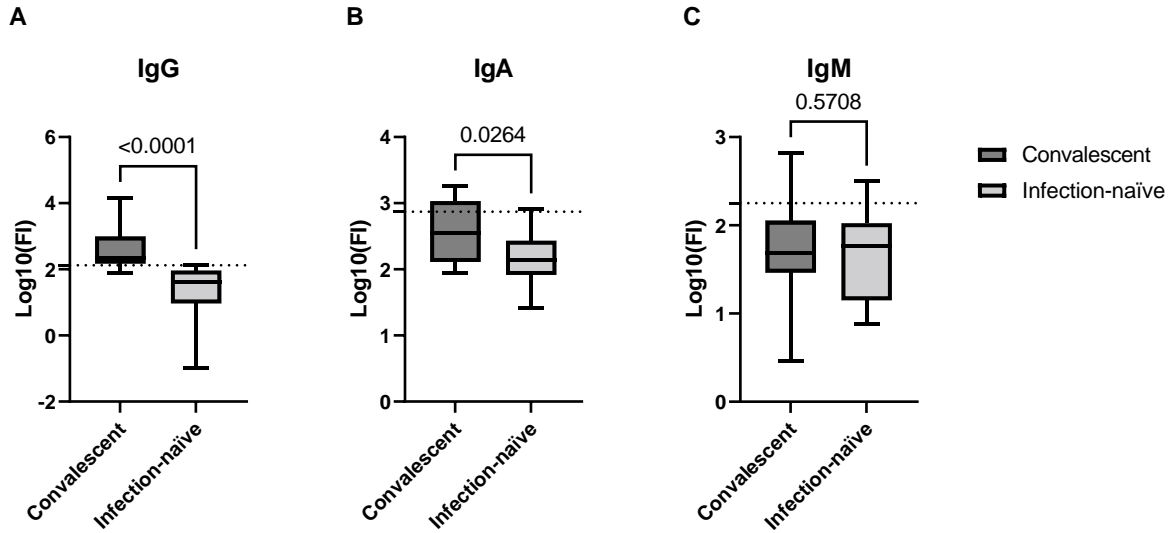

**Supplementary Figure 1. Validation tests of antibodies in saliva against RBD from SARS-CoV-2 in the Luminex assay.** Boxplots showing the level of antibodies in Log<sub>10</sub>(Fluorescence Intensity [FI]) in convalescent individuals and infection-naïve individuals. SARS-CoV-2 infection was confirmed by a positive RT-PCR result. All samples were collected before vaccination. Levels of IgG antibodies (A), levels of IgA antibodies (B), and levels of IgM antibodies (C) in convalescent and infection-naïve individuals. The horizontal dotted line indicates the assay cutoff. The p-values have been calculated using a Mann-Whitney test.  $p < 0.05$  was considered significant.
